# Supplementary material for: A novel community driven software for functional enrichment analysis of extracellular vesicles data
Source: PubMed Central journal article supplement — J Extracell Vesicles. 2017 May 26;6(1):1321455. doi: 10.1080/20013078.2017.1321455 (PMC5505018; doi:10.1080/20013078.2017.1321455), 2017-05-26
Supplement: zjev_a_1321455_sm5558.pdf [file zjev_a_1321455_sm5558.pdf]

## Supplementary Table 1: List of request/changes from the users and the status of its implementation

| #  | Requested feature                                                                          | No of user requests | Status                                                                              |             |
|----|--------------------------------------------------------------------------------------------|---------------------|-------------------------------------------------------------------------------------|-------------|
| 1  | Implement miRNA enrichment analysis                                                        | 33                  | ✓                                                                                   | Completed   |
| 2  | Venn diagram between Vesiclepedia and my dataset(s)                                        | 26                  | ✓                                                                                   | Completed   |
| 3  | Generate heatmaps for input datasets                                                       | 24                  | ✓                                                                                   | Completed   |
| 4  | Improved coverage of UniProt IDs                                                           | 24                  | ✓                                                                                   | Completed   |
| 5  | Mac or linux compatitbility or web based FunRich version                                   | 21                  |  | In progress |
| 6  | Real time database update                                                                  | 20                  | ✓                                                                                   | Completed   |
| 7  | Compare more than two input datasets for enrichment analysis                               | 19                  | ✓                                                                                   | Completed   |
| 8  | Option to customize the color of charts/graphs                                             | 18                  | ✓                                                                                   | Completed   |
| 9  | Download proteins/RNA identified in extracellular vesicles isolated from a specific sample | 16                  | ✓                                                                                   | Completed   |
| 10 | Download proteins/RNA identified exclusively in a subtype of extracellular vesicle         | 16                  | ✓                                                                                   | Completed   |
| 11 | Regular update of background databases                                                     | 16                  | ✓                                                                                   | Completed   |
| 12 | Download top 100 proteins identified in extracellular vesicles                             | 14                  | ✓                                                                                   | Completed   |
| 13 | Allow users to control the databases                                                       | 14                  | ✓                                                                                   | Completed   |

|    |                                                                                                                                                                                                             |    |                                                                                     |             |
|----|-------------------------------------------------------------------------------------------------------------------------------------------------------------------------------------------------------------|----|-------------------------------------------------------------------------------------|-------------|
| 14 | Download all proteins/RNA identified in a subtype of extracellular vesicle                                                                                                                                  | 13 | ✓                                                                                   | Completed   |
| 15 | Enrichment of genes in different cancer types using COSMIC data                                                                                                                                             | 13 | ✓                                                                                   | Completed   |
| 16 | Save workspace or session feature                                                                                                                                                                           | 12 | ✓                                                                                   | Completed   |
| 17 | Option to upload miRNA gene name or miRbase accession number                                                                                                                                                | 12 | ✓                                                                                   | Completed   |
| 18 | Quantitative expression profile based enrichment analysis                                                                                                                                                   | 11 | ✓                                                                                   | Completed   |
| 19 | Implement metabolomic enrichment analysis                                                                                                                                                                   | 10 |  | In progress |
| 20 | Update Vesiclepedia data automatically                                                                                                                                                                      | 10 | ✓                                                                                   | Completed   |
| 21 | Mapping and conversion of accession IDs to different databases                                                                                                                                              | 10 | ✓                                                                                   | Completed   |
| 22 | Venn diagram of the Vesiclepedia would benefit from displaying distribution of the sample genes by EV subtypes                                                                                              | 9  | ✓                                                                                   | Completed   |
| 23 | Description of the Vesiclepedia section in the manual                                                                                                                                                       | 8  | ✓                                                                                   | Completed   |
| 24 | For each protein resulting shared using Venn diagram tool to specify type of experiment through which it was identified in exosomes and provide the link to PubMed references supporting its identification | 8  | ✓                                                                                   | Completed   |
| 25 | Description or full name that can appear on mouse click or as a pop up window for terms/domains                                                                                                             | 7  | ✓                                                                                   | Completed   |
| 26 | Option to choose more databases to use as background for heatmaps                                                                                                                                           | 7  | ✓                                                                                   | Completed   |
| 27 | For each protein in the lists derived from Venn diagram report in which type of sample it was identified                                                                                                    | 7  | ✓                                                                                   | Completed   |
| 28 | Ability to download the top hits (protein/ mRNA/ miRNA/ lipids)                                                                                                                                             | 7  | ✓                                                                                   | Completed   |

|    |                                                                                                                                                 |   |                                                                                       |             |
|----|-------------------------------------------------------------------------------------------------------------------------------------------------|---|---------------------------------------------------------------------------------------|-------------|
| 29 | Ability to search for proteins that are being currently used. Especially important if you are looking for a protein / bunch of proteins amongst | 7 | ✓                                                                                     | Completed   |
| 30 | Edit font of all charts/graphs                                                                                                                  | 7 | ✓                                                                                     | Completed   |
| 31 | Refer the nature or source of the interaction in interaction maps (text mining or experimental)                                                 | 6 |    | In progress |
| 32 | Ability to find the references of filtered dataset when comparing custom dataset with the filtered dataset from Vesiclepedia                    | 6 | ✓                                                                                     | Completed   |
| 33 | Identify upregulated and downregulated proteins for specific biological process from heatmap data                                               | 6 | ✓                                                                                     | Completed   |
| 34 | Suggestions for the manual: for a first-time user, a description of the input data (examples would suffice) would be necessary                  | 6 | ✓                                                                                     | Completed   |
| 35 | Upload data from an Excel sheet                                                                                                                 | 6 | ✓                                                                                     | Completed   |
| 36 | For each protein list from the Venn diagram, provide, if available, the link to its interactome                                                 | 5 | ✓                                                                                     | Completed   |
| 37 | More cancer types under the cell lines tab                                                                                                      | 5 | ✓                                                                                     | Completed   |
| 38 | Content types should also include other molecules including lncRNAs, piRNA, snoRNA or can be listed as other RNA molecules.                     | 5 |    | In progress |
| 39 | Set a default output option which allows to export a summary report including excel files, image files and a summary text                       | 5 | ✓                                                                                     | Completed   |
| 40 | Clustered heatmap                                                                                                                               | 5 | ✓                                                                                     | Completed   |
| 41 | Under the tissue/cell types include CSF                                                                                                         | 4 | ✓                                                                                     | Completed   |
| 42 | Reflect the fragmentation status of the vesicular RNAs (fragmented vs. intact)                                                                  | 4 |  | In progress |
| 43 | Implement quantitative Venn diagram of differentially expressed genes/proteins                                                                  | 3 | ✓                                                                                     | Completed   |
| 44 | Include videos for custom database upload                                                                                                       | 3 | ✓                                                                                     | Completed   |

|    |                                                                          |   |   |           |
|----|--------------------------------------------------------------------------|---|---|-----------|
| 45 | Implement Recatome pathway enrichment and automatic download of database | 3 | ✓ | Completed |
| 46 | Implement Gene Ontology enrichment and automatic download of database    | 3 | ✓ | Completed |
| 47 | Display graphs/charts in Excel sheet automatically                       | 3 | ✓ | Completed |
| 48 | Find targets for miRNA                                                   | 3 | ✓ | Completed |
| 49 | Heatmap of interested genes (not clustered)                              | 2 | ✓ | Completed |
| 50 | Enrichment analysis using quantitative values                            | 2 | ✓ | Completed |
| 51 | Convert Gene Symbol to UniProt IDs                                       | 2 | ✓ | Completed |
| 52 | Find which miRNA will bind to my gene list                               | 1 | ✓ | Completed |
| 53 | Implement q value method (Storey and Tibshirani)                         | 1 | ✓ | Completed |
| 54 | Protein-protein interaction for other species (non human)                | 1 | ✓ | Completed |
